# Supplementary material
Source: PubMed Central journal article supplement (PMC11192144)
Supplement: NIHMS1993972-supplement-Supplement.pdf [file NIHMS1993972-supplement-Supplement.pdf]

## Supplementary Material\*

Lin S, Cienfuegos S, Ezpeleta M, et al. Time-restricted eating without calorie counting for weight loss in a racially diverse population. A randomized controlled trial. *Ann Intern Med.* 27 June 2023. [Epub ahead of print].  
doi:10.7326/M23-0052

|                                                                                                                                             |    |
|---------------------------------------------------------------------------------------------------------------------------------------------|----|
| <i>Supplement Figure 1.</i> Experimental design                                                                                             | 2  |
| <i>Supplement Figure 2.</i> Correlation between body weight and insulin sensitivity                                                         | 3  |
| <i>Supplement Figure 3.</i> Adherence to the diet interventions                                                                             | 4  |
| <i>Supplement Table 1.</i> Baseline characteristics of all participants, completers, and dropouts                                           | 5  |
| <i>Supplement Table 2.</i> SI Units for change in fasting glucose, insulin, and plasma lipids from baseline and between intervention groups | 7  |
| <i>Supplement Table 3.</i> Multiple imputation sensitivity analysis results                                                                 | 8  |
| <i>Supplement Table 4.</i> Adverse events during the intervention                                                                           | 9  |
| CONSORT Checklist                                                                                                                           | 10 |
| Statistical Supplement                                                                                                                      | 12 |

\* This supplementary material was provided by the authors to give readers further details on their article. The material was not copyedited.

Supplement Figure 1. Experimental design

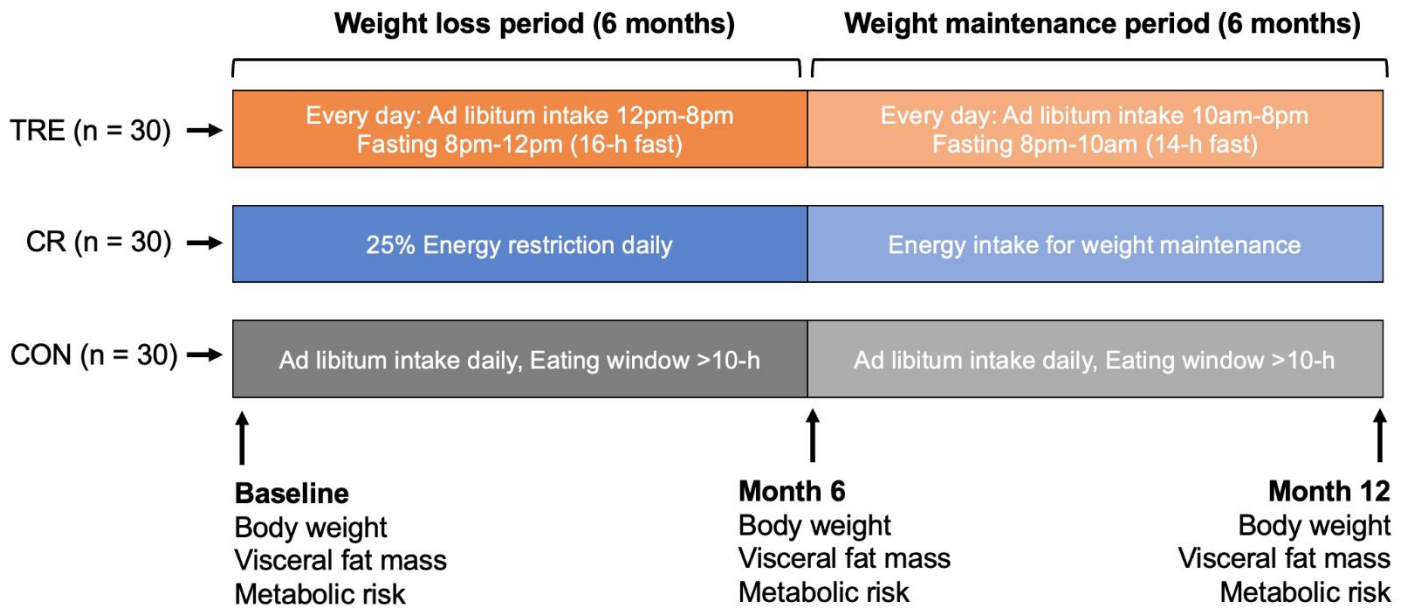

Supplement Figure 2. Correlation between body weight and insulin sensitivity

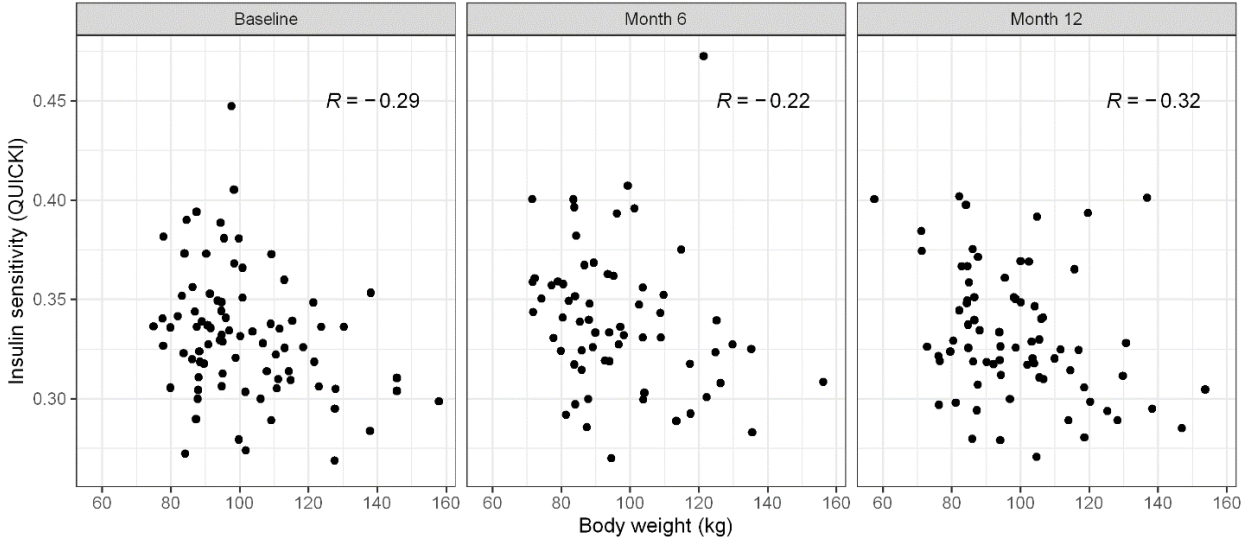

Supplement Figure 3. Adherence to the diet interventions

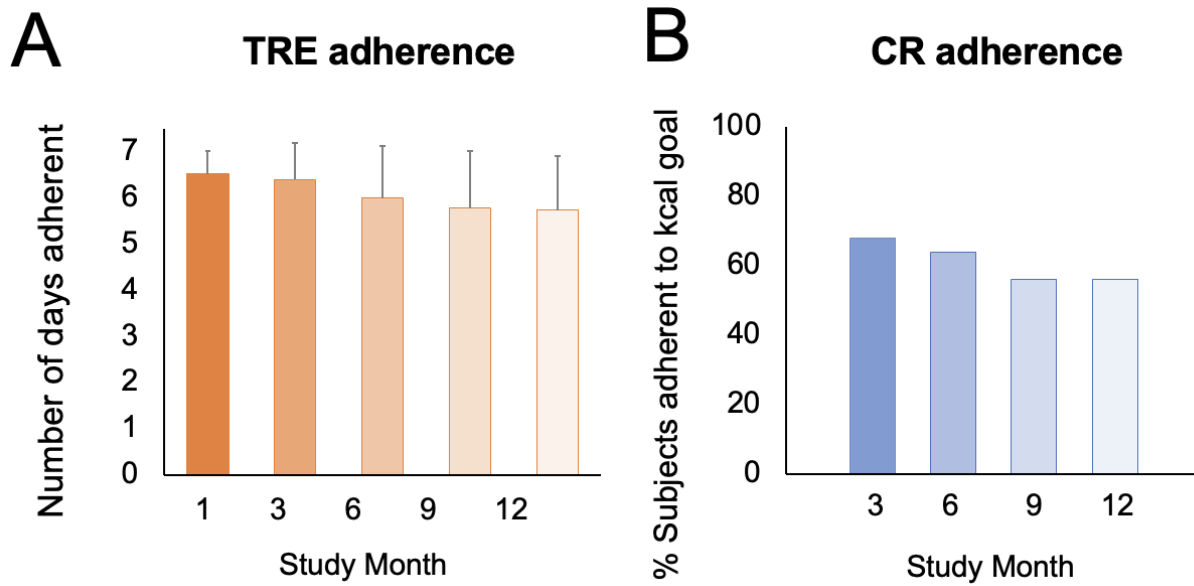

**A.** Adherence to the time restriction eating (TRE) intervention over 12 months. Data are expressed as mean (SD) days per week that participants reported being adherent with the 12:00 pm to 8:00 pm eating window; only observed values included. A total of 22/30 TRE participants returned all adherence logs. Adherence at month 1:  $6.5 \pm 0.5$  days/week; month 3:  $6.4 \pm 0.8$  days/week; month 6:  $6.1 \pm 1.2$  days/week; month 9:  $5.8 \pm 1.3$  days/week; month 12:  $5.8 \pm 1.2$  days/week. **B.** Adherence to the daily calorie restriction (CR) intervention over 12 months. Data are expressed as the proportion of participants whose actual energy intake, determined via food records, was within 200 kcal of their prescribed daily energy goal; only observed values included. A total of 17/30 CR participants returned all food records. Adherence at month 3: 68% participants adherent; month 6: 64% participants adherent; month 9: 56% participants adherent; month 12: 56% participants adherent.

**Supplement Table 1. Baseline characteristics of all participants, completers, and dropouts**

|                                           | All participants | Completers  | All dropouts | Dropouts<br>TRE | Dropouts<br>CR | Dropouts<br>Control |
|-------------------------------------------|------------------|-------------|--------------|-----------------|----------------|---------------------|
| <b>n</b>                                  | 90               | 77          | 13           | 4               | 5              | 4                   |
| <b>Age (y)</b>                            | 44 ± 11          | 44 ± 12     | 41 ± 8       | 46 ± 6          | 41 ± 11        | 36 ± 4              |
| <b>Sex</b>                                |                  |             |              |                 |                |                     |
| Female                                    | 74 (82%)         | 66 (86%)    | 8 (62%)      | 4 (100%)        | 2 (40%)        | 2 (50%)             |
| Male                                      | 16 (18%)         | 11 (14%)    | 5 (38%)      | 0 (0%)          | 3 (60%)        | 2 (50%)             |
| <b>Race or ethnic group</b>               |                  |             |              |                 |                |                     |
| Black                                     | 30 (33%)         | 27 (35%)    | 3 (23%)      | 2 (50%)         | 1 (20%)        | 0 (0%)              |
| Asian                                     | 6 (7%)           | 5 (6%)      | 1 (8%)       | 0 (0%)          | 1 (20%)        | 0 (0%)              |
| Hispanic                                  | 41 (46%)         | 35 (45%)    | 6 (46%)      | 2 (50%)         | 0 (0%)         | 4 (100%)            |
| White                                     | 13 (14%)         | 10 (13%)    | 3 (23%)      | 0 (0%)          | 3 (60%)        | 0 (0%)              |
| <b>Body composition</b>                   |                  |             |              |                 |                |                     |
| Body weight (kg)                          | 101 ± 17         | 101 ± 17    | 105 ± 18     | 103 ± 6         | 110 ± 24       | 100 ± 20            |
| Fat mass (kg)                             | 47 ± 11          | 47 ± 11     | 51 ± 13      | 54 ± 9          | 52 ± 17        | 50 ± 9              |
| Lean mass (kg)                            | 50 ± 9           | 50 ± 9      | 51 ± 9       | 50 ± 5          | 53 ± 10        | 56 ± 14             |
| Visceral fat mass (kg)                    | 1.7 ± 0.7        | 1.6 ± 0.7   | 2.3 ± 0.8    | 2.0 ± 0.7       | 2.5 ± 0.8      | 2.2 ± 1.2           |
| Waist circumference (cm)                  | 110 ± 13         | 108 ± 12    | 117 ± 15     | 117 ± 13        | 117 ± 16       | 115 ± 25            |
| Height (cm)                               | 165 ± 8          | 165 ± 8     | 167 ± 7      | 162 ± 5         | 169 ± 11       | 168 ± 2             |
| BMI (kg/m <sup>2</sup> )                  | 37 ± 5           | 37 ± 5      | 38 ± 6       | 39 ± 1          | 39 ± 9         | 36 ± 6              |
| <b>Bone parameters</b>                    |                  |             |              |                 |                |                     |
| Bone mineral density (g/cm <sup>2</sup> ) | 1.29 ± 0.13      | 1.29 ± 0.14 | 1.26 ± 0.09  | 1.28 ± 0.15     | 1.25 ± 0.06    | 1.26 ± 0.05         |
| Bone mineral content (g)                  | 2660 ± 420       | 2658 ± 461  | 2617 ± 253   | 2551 ± 168      | 2656 ± 358     | 2649 ± 136          |
| <b>Blood pressure, heart rate</b>         |                  |             |              |                 |                |                     |
| Systolic BP (mm Hg)                       | 125 ± 15         | 124 ± 15    | 131 ± 13     | 135 ± 14        | 130 ± 10       | 129 ± 22            |
| Diastolic BP (mm Hg)                      | 84 ± 9           | 83 ± 9      | 89 ± 10      | 95 ± 6          | 87 ± 11        | 84 ± 14             |
| Heart rate (bpm)                          | 75 ± 13          | 74 ± 11     | 77 ± 19      | 75 ± 23         | 77 ± 20        | 80 ± 15             |
| <b>Plasma lipids</b>                      |                  |             |              |                 |                |                     |
| Total cholesterol (mg/dl)                 | 182 ± 33         | 182 ± 34    | 181 ± 25     | 187 ± 17        | 183 ± 29       | --                  |
| LDL cholesterol (mg/dl)                   | 106 ± 29         | 106 ± 30    | 108 ± 24     | 111 ± 14        | 111 ± 29       | --                  |
| HDL cholesterol (mg/dl)                   | 53 ± 13          | 52 ± 14     | 51 ± 11      | 54 ± 11         | 54 ± 9         | --                  |
| Triglycerides (mg/dl)                     | 113 ± 57         | 115 ± 58    | 104 ± 143    | 110 ± 29        | 88 ± 44        | --                  |
|                                           |                  |             |              |                 |                | --                  |

| <b>Glucoregulatory factors</b> |             |             |             |             |             |    |
|--------------------------------|-------------|-------------|-------------|-------------|-------------|----|
| Fasting glucose (mg/dl)        | 88 ± 12     | 88 ± 13     | 87 ± 8      | 83 ± 3      | 86 ± 8      | -- |
| Fasting insulin (μU/mL)        | 15 ± 10     | 14 ± 10     | 16 ± 7      | 15 ± 6      | 15 ± 8      | -- |
| Insulin resistance (HOMA-IR)   | 3.3 ± 2.4   | 3.1 ± 2.4   | 3.4 ± 1.7   | 3.1 ± 1.3   | 3.2 ± 1.7   | -- |
| Insulin sensitivity (QUICKI)   | 0.33 ± 0.03 | 0.33 ± 0.03 | 0.33 ± 0.03 | 0.33 ± 0.02 | 0.33 ± 0.03 | -- |
| HbA1c (%)                      | 5.5 ± 0.5   | 5.5 ± 0.5   | 5.4 ± 0.6   | 5.7 ± 1.0   | 5.1 ± 0.3   | -- |

Data are expressed as mean (SD) unless otherwise indicated. Abbreviations: BP: Blood pressure; BMI: Body mass index, CR: Calorie restriction, HbA1c: Glycated hemoglobin; HDL, high-density lipoprotein; HOMA-IR, homeostasis model assessment of insulin resistance; LDL, low-density lipoprotein; QUICKI: Quantitative insulin sensitivity check index, TRE: Time restricted eating.

**Supplement Table 2. SI Units for change in fasting glucose, insulin, and plasma lipids from baseline and between intervention groups**

| Variables                         | Change from baseline (95% CI) |                              |                                | Difference between groups (95% CI) |                        |                       |                       |
|-----------------------------------|-------------------------------|------------------------------|--------------------------------|------------------------------------|------------------------|-----------------------|-----------------------|
|                                   | N                             | Time restricted eating (TRE) | Daily calorie restriction (CR) | Control (CON)                      | TRE vs CR              | TRE vs CON            | CR vs CON             |
| <b>Secondary outcomes</b>         |                               |                              |                                |                                    |                        |                       |                       |
| <b>Fasting glucose (mmol/l)</b>   |                               |                              |                                |                                    |                        |                       |                       |
| 6 months                          | 74                            | -0.09 (-0.36, 0.18)          | -0.05 (-0.31, 0.22)            | 0.16 (-0.15, 0.47)                 | -0.05 (-0.42, 0.33)    | -0.25 (-0.65, 0.15)   | -0.21 (-0.61, 0.20)   |
| 12 months                         | 74                            | 0.16 (-0.06, 0.38)           | 0.32 (0.07, 0.58)              | 0.35 (0.09, 0.61)                  | -0.17 (-0.50, 0.16)    | -0.19 (-0.52, 0.14)   | -0.02 (-0.38, 0.33)   |
| <b>Fasting insulin (pmol/L)</b>   |                               |                              |                                |                                    |                        |                       |                       |
| 6 months                          | 74                            | -17.34 (-36.66, 2.04)        | -5.46 (-18.24, 7.26)           | 3.90 (-14.10, 21.84)               | -11.82 (-34.44, 10.74) | -21.18 (-46.92, 4.50) | -9.36 (-30.84, 12.12) |
| 12 months                         | 74                            | -16.98 (-32.04, -1.98)       | -0.72 (-13.32, 11.82)          | 8.64 (-13.92, 31.26)               | -16.26 (-35.34, 2.88)  | -25.62 (-52.08, 0.78) | -9.42 (-34.62, 15.78) |
| <b>Total cholesterol (mmol/l)</b> |                               |                              |                                |                                    |                        |                       |                       |
| 6 months                          | 74                            | -0.03 (-0.22, 0.17)          | -0.11 (-0.37, 0.15)            | 0.02 (-0.20, 0.23)                 | 0.08 (-0.24, 0.40)     | -0.04 (-0.33, 0.24)   | -0.13 (-0.46, 0.21)   |
| 12 months                         | 74                            | -0.04 (-0.25, 0.16)          | -0.04 (-0.25, 0.17)            | -0.02 (-0.19, 0.16)                | 0.00 (-0.29, 0.29)     | -0.03 (-0.29, 0.24)   | -0.03 (-0.29, 0.24)   |
| <b>LDL cholesterol (mmol/l)</b>   |                               |                              |                                |                                    |                        |                       |                       |
| 6 months                          | 74                            | 0.02 (-0.18, 0.22)           | -0.16 (-0.40, 0.09)            | 0.03 (-0.14, 0.21)                 | 0.17 (-0.13, 0.48)     | -0.01 (-0.27, 0.24)   | -0.19 (-0.48, 0.10)   |
| 12 months                         | 74                            | -0.02 (-0.24, 0.19)          | -0.03 (-0.19, 0.12)            | 0.06 (-0.12, 0.24)                 | 0.01 (-0.25, 0.27)     | -0.08 (-0.35, 0.19)   | -0.10 (-0.33, 0.14)   |
| <b>HDL cholesterol (mmol/l)</b>   |                               |                              |                                |                                    |                        |                       |                       |
| 6 months                          | 74                            | -0.05 (-0.13, 0.04)          | 0.03 (-0.08, 0.13)             | -0.02 (-0.07, 0.03)                | -0.07 (-0.21, 0.06)    | -0.03 (-0.12, 0.07)   | 0.05 (-0.07, 0.16)    |
| 12 months                         | 74                            | -0.04 (-0.12, 0.04)          | 0.00 (-0.12, 0.11)             | -0.07 (-0.14, -0.01)               | -0.04 (-0.17, 0.10)    | 0.03 (-0.06, 0.13)    | 0.07 (-0.06, 0.20)    |
| <b>Triglycerides (mmol/l)</b>     |                               |                              |                                |                                    |                        |                       |                       |
| 6 months                          | 74                            | 0.00 (-0.25, 0.25)           | 0.08 (-0.06, 0.22)             | -0.01 (-0.21, 0.20)                | -0.08 (-0.36, 0.21)    | 0.01 (-0.31, 0.33)    | 0.08 (-0.16, 0.33)    |
| 12 months                         | 74                            | 0.04 (-0.12, 0.20)           | 0.00 (-0.15, 0.14)             | 0.00 (-0.20, 0.20)                 | 0.04 (-0.17, 0.25)     | 0.04 (-0.21, 0.29)    | 0.00 (-0.24, 0.24)    |

Data were included for 90 participants; means were estimated using an intention-to-treat analysis using a linear mixed model. Error bars indicate 95% confidence intervals for each parameter from baseline by diet group. Abbreviations: HDL, high-density lipoprotein; LDL, low-density lipoprotein. The widths of the confidence intervals have not been adjusted for multiplicity and should therefore not be used to reject or not reject treatment effects.

### Supplement Table 3. Multiple imputation sensitivity analysis results

| Variables                                 | Difference between groups at month 12 (95% CI) |                           |                             |                             |
|-------------------------------------------|------------------------------------------------|---------------------------|-----------------------------|-----------------------------|
|                                           | Baseline<br>N                                  | TRE vs CR                 | TRE vs CON                  | CR vs CON                   |
| Body weight (kg)                          | 90                                             | 0.88 (-4.72, 6.48) p=0.75 | -3.99 (-7.00, -0.99) p=0.01 | -4.87 (-8.62, -1.13) p=0.01 |
| Fat mass (kg)                             | 88                                             | 0.33 (-4.06, 4.72)        | -2.86 (-5.41, -0.32)        | -3.20 (-6.66, 0.27)         |
| Lean mass (kg)                            | 88                                             | 0.27 (-1.53, 2.06)        | -0.71 (-1.92, 0.50)         | -0.98 (-2.38, 0.42)         |
| Visceral fat mass (kg)                    | 88                                             | 0.00 (-0.20, 0.21)        | -0.10 (-0.27, 0.07)         | -0.10 (-0.33, 0.12)         |
| Waist circumference (cm)                  | 88                                             | -2.06 (-14.97, 10.85)     | -4.67 (-7.93, -1.41)        | -2.61 (-7.00, 1.78)         |
| BMI (kg/m <sup>2</sup> )                  | 90                                             | 0.32 (-2.23, 2.87)        | -1.51 (-2.61, -0.42)        | -1.83 (-3.24, -0.42)        |
| Bone mineral density (g/cm <sup>2</sup> ) | 88                                             | 0.01 (-0.05, 0.07)        | 0.00 (-0.02, 0.02)          | -0.01 (-0.03, 0.01)         |
| Bone mineral content (g)                  | 88                                             | -7.57 (-218.43, 203.30)   | 9.26 (-55.63, 74.15)        | 16.82 (-55.68, 89.33)       |
| Fasting glucose (mg/dl)                   | 84                                             | -2.33 (-17.66, 13.00)     | -3.18 (-9.26, 2.89)         | -0.85 (-7.36, 5.65)         |
| Fasting insulin (μIU/mL)                  | 84                                             | -2.64 (-17.57, 12.29)     | -4.11 (-8.70, 0.48)         | -1.47 (-6.00, 3.07)         |
| Insulin resistance (HOMA-IR)              | 84                                             | -0.56 (-3.79, 2.66)       | -0.98 (-2.12, 0.17)         | -0.42 (-1.48, 0.65)         |
| Insulin sensitivity (QUICKI)              | 84                                             | 0.01 (-0.07, 0.10)        | 0.02 (0.01, 0.04)           | 0.01 (-0.01, 0.02)          |
| HbA1c (%)                                 | 84                                             | -0.07 (-0.44, 0.30)       | -0.08 (-0.26, 0.10)         | -0.01 (-0.19, 0.16)         |
| Systolic BP (mm Hg)                       | 88                                             | 2.38 (-7.30, 12.07)       | -1.76 (-8.81, 5.30)         | -4.14 (-11.18, 2.90)        |
| Diastolic BP (mm Hg)                      | 88                                             | -1.90 (-11.35, 7.55)      | -3.45 (-8.31, 1.40)         | -1.56 (-6.15, 3.03)         |
| Heart rate (bpm)                          | 88                                             | -4.27 (-17.63, 9.09)      | -0.74 (-7.12, 5.64)         | 3.53 (-2.96, 10.02)         |
| Total cholesterol (mg/dl)                 | 84                                             | 0.80 (-18.28, 19.88)      | -0.69 (-11.85, 10.48)       | -1.49 (-12.97, 10.00)       |
| LDL cholesterol (mg/dl)                   | 84                                             | 1.10 (-18.10, 20.31)      | -3.16 (-14.18, 7.86)        | -4.26 (-15.58, 7.05)        |
| HDL cholesterol (mg/dl)                   | 84                                             | -0.66 (-13.39, 12.07)     | 1.19 (-2.91, 5.30)          | 1.85 (-3.20, 6.90)          |
| Triglycerides (mg/dl)                     | 84                                             | 1.26 (-60.99, 63.52)      | 4.73 (-18.78, 28.24)        | 3.47 (-19.42, 26.36)        |

Data were included for 90 participants; missing values of the outcome at non-baseline time points were imputed using multiple imputation by chained equations in these sensitivity analyses. Means were estimated using an intention-to-treat analysis using a linear mixed model. Error bars indicate 95% confidence intervals for each parameter from baseline by diet group. Abbreviations: BP: Blood pressure; CR: Calorie restriction, HbA1c: Glycated hemoglobin; HDL, high-density lipoprotein; HOMA, homeostasis model assessment of insulin resistance; LDL, low-density lipoprotein; QUICKI: Quantitative insulin sensitivity check index, TRE: Time restricted eating. The widths of the confidence intervals have not been adjusted for multiplicity and should therefore not be used to reject or not reject treatment effects.



**Supplement Table 4. Adverse events during the intervention**

|                                        | <b>Time restricted eating<br/>(n =30)</b> | <b>Calorie restriction<br/>(n =30)</b> | <b>Control<br/>(n =30)</b> |
|----------------------------------------|-------------------------------------------|----------------------------------------|----------------------------|
|                                        | <b>No. (%) participants</b>               |                                        |                            |
| <b>General adverse events</b>          |                                           |                                        |                            |
| Headache                               | 16 (53)                                   | 18 (60)                                | 19 (63)                    |
| Dizziness                              | 7 (23)                                    | 9 (30)                                 | 10 (33)                    |
| Fatigue                                | 15 (50)                                   | 14 (47)                                | 18 (60)                    |
| Irritability                           | 16 (53)                                   | 17 (57)                                | 13 (43)                    |
| Halitosis                              | 10 (33)                                   | 11 (37)                                | 12 (40)                    |
| Dry mouth                              | 13 (43)                                   | 16 (53)                                | 16 (53)                    |
| <b>Gastrointestinal adverse events</b> |                                           |                                        |                            |
| Nausea                                 | 9 (30)                                    | 14 (47)                                | 12 (40)                    |
| Vomiting                               | 9 (30)                                    | 9 (30)                                 | 8 (27)                     |
| Diarrhea                               | 13 (43)                                   | 11 (37)                                | 15 (50)                    |
| Constipation                           | 14 (47)                                   | 14 (47)                                | 16 (53)                    |

Data are expressed as the number of participants with at least one adverse event that occurred during the 12-month intervention. Participants may have experienced an adverse event at more than one time point. No significant differences between groups for occurrences of any adverse event.

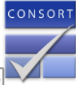

## CONSORT 2010 checklist of information to include when reporting a randomised trial\*

| Section/Topic                    | Item No | Checklist item                                                                                                                                                                              | Reported on page No |
|----------------------------------|---------|---------------------------------------------------------------------------------------------------------------------------------------------------------------------------------------------|---------------------|
| <b>Title and abstract</b>        |         |                                                                                                                                                                                             |                     |
|                                  | 1a      | Identification as a randomised trial in the title                                                                                                                                           | 1                   |
|                                  | 1b      | Structured summary of trial design, methods, results, and conclusions (for specific guidance see CONSORT for abstracts)                                                                     | 2                   |
| <b>Introduction</b>              |         |                                                                                                                                                                                             |                     |
| Background and objectives        | 2a      | Scientific background and explanation of rationale                                                                                                                                          | 3-4                 |
|                                  | 2b      | Specific objectives or hypotheses                                                                                                                                                           | 4                   |
| <b>Methods</b>                   |         |                                                                                                                                                                                             |                     |
| Trial design                     | 3a      | Description of trial design (such as parallel, factorial) including allocation ratio                                                                                                        | 5                   |
|                                  | 3b      | Important changes to methods after trial commencement (such as eligibility criteria), with reasons                                                                                          | NA                  |
| Participants                     | 4a      | Eligibility criteria for participants                                                                                                                                                       | 5                   |
|                                  | 4b      | Settings and locations where the data were collected                                                                                                                                        | 5                   |
| Interventions                    | 5       | The interventions for each group with sufficient details to allow replication, including how and when they were <u>actually administered</u>                                                | 6-7                 |
| Outcomes                         | 6a      | Completely defined pre-specified primary and secondary outcome measures, including how and when they were assessed                                                                          | 8                   |
|                                  | 6b      | Any changes to trial outcomes after the trial commenced, with reasons                                                                                                                       | NA                  |
| Sample size                      | 7a      | How sample size was determined                                                                                                                                                              | 8-9                 |
|                                  | 7b      | When applicable, explanation of any interim analyses and stopping guidelines                                                                                                                | NA                  |
| Randomisation:                   |         |                                                                                                                                                                                             |                     |
| Sequence generation              | 8a      | Method used to generate the random allocation sequence                                                                                                                                      | 6                   |
|                                  | 8b      | Type of randomisation; details of any restriction (such as blocking and block size)                                                                                                         | 6                   |
| Allocation concealment mechanism | 9       | Mechanism used to implement the random allocation sequence (such as sequentially numbered containers), describing any steps taken to conceal the sequence until interventions were assigned | 6                   |
| Implementation                   | 10      | Who generated the random allocation sequence, who enrolled participants, and who assigned participants to interventions                                                                     | 20                  |
| Blinding                         | 11a     | If done, who was blinded after assignment to interventions (for example, participants, care providers, those                                                                                | 5                   |

|                                                      |     |                                                                                                                                                   |                           |
|------------------------------------------------------|-----|---------------------------------------------------------------------------------------------------------------------------------------------------|---------------------------|
|                                                      |     | assessing outcomes) and how                                                                                                                       |                           |
|                                                      | 11b | If relevant, description of the similarity of interventions                                                                                       | NA                        |
| Statistical methods                                  | 12a | Statistical methods used to compare groups for primary and secondary outcomes                                                                     | 8-10                      |
|                                                      | 12b | Methods for additional analyses, such as subgroup analyses and adjusted analyses                                                                  | 8-10                      |
| <b>Results</b>                                       |     |                                                                                                                                                   |                           |
| Participant flow (a diagram is strongly recommended) | 13a | For each group, the numbers of participants who were randomly assigned, received intended treatment, and were analysed for the primary outcome    | Figure 1                  |
|                                                      | 13b | For each group, <u>losses</u> and exclusions after randomisation, together with reasons                                                           | Figure 1                  |
| Recruitment                                          | 14a | Dates defining the periods of recruitment and follow-up                                                                                           | 5                         |
|                                                      | 14b | Why the trial ended or was stopped                                                                                                                | NA                        |
| Baseline data                                        | 15  | A table showing baseline demographic and clinical characteristics for each group                                                                  | Table 1                   |
| Numbers analysed                                     | 16  | For each group, number of participants (denominator) included in each analysis and whether the analysis was by original assigned groups           | All tables/figures        |
| Outcomes and estimation                              | 17a | For each primary and secondary outcome, results for each group, and the estimated effect size and its precision (such as 95% confidence interval) | Figure 2<br>Table 2 and 3 |
|                                                      | 17b | For binary outcomes, presentation of both absolute and relative effect sizes is recommended                                                       | Table S1                  |
| Ancillary analyses                                   | 18  | Results of any other analyses performed, including subgroup analyses and adjusted analyses, distinguishing pre-specified from exploratory         | NA                        |
| Harms                                                | 19  | All important harms or unintended effects in each group (for specific guidance see CONSORT for harms)                                             | Table S2                  |
| <b>Discussion</b>                                    |     |                                                                                                                                                   |                           |
| Limitations                                          | 20  | Trial limitations, addressing sources of potential bias, imprecision, and, if relevant, multiplicity of analyses                                  | 18-19                     |
| Generalisability                                     | 21  | Generalisability (external validity, applicability) of the trial findings                                                                         | 19                        |
| Interpretation                                       | 22  | Interpretation consistent with results, balancing <u>benefits</u> and harms, and considering other relevant evidence                              | 19                        |
| <b>Other information</b>                             |     |                                                                                                                                                   |                           |
| Registration                                         | 23  | Registration number and name of trial registry                                                                                                    | 2, 5                      |
| Protocol                                             | 24  | Where the full trial protocol can be accessed, if available                                                                                       | 5                         |
| Funding                                              | 25  | Sources of funding and other support (such as supply of drugs), role of funders                                                                   | 10, 20                    |

\*We strongly recommend reading this statement in conjunction with the CONSORT 2010 Explanation and Elaboration for important clarifications on all the items. If relevant, we also recommend reading CONSORT extensions for cluster randomised trials, non-inferiority and equivalence trials, non-pharmacological treatments, herbal interventions, and pragmatic trials. Additional extensions are forthcoming: for those and for up to date references relevant to this checklist, see [www.consort-statement.org](http://www.consort-statement.org).

## Statistical Supplement

The causal quantities from the primary linear mixed effects model for body weight are the pairwise contrasts between the within-group contrasts from time 0 (baseline) to time 12. These quantities (estimands) correspond directly to parameters estimated in the model equation.

### Notation and Convention

Let  $A_i = TRE$  if participant  $i$  was assigned to the TRE group,  $A_i = CR$  if participant  $i$  was assigned to the CR group, and  $A_i = control$  if participant  $i$  was assigned to the control group. Let  $b_i$  be the random intercept for participant  $i$ .

Let time  $t = \{0, 1, \dots, 12\}$  be time in months since baseline. Let  $Y_{it}$  be body weight for participant  $i$  at time  $t$ . Let  $S$  be the 13x6 basis matrix corresponding to a cubic spline for time with knots placed at 3.5, 6.5, 9.5 months. By design, the row of  $S$  corresponding to baseline is the zero vector; that is,  $S_{0,k} = 0$  for  $k = 1, \dots, 6$ . The row of  $S$  corresponding to month 12 is  $S_{12,6} = 1$  and  $S_{12,k} = 0$  for  $k = 1, \dots, 5$ .

### Model and Estimands

The linear mixed effects model for body weight can be written as

$$E[Y_{it}] = \beta_0 + \beta_{TRE}I(A_i = TRE) + \beta_{CR}I(A_i = CR) + \left[ \sum_{k=1}^6 \beta_k S_{tk} \right] + \left[ \sum_{k=1}^6 \beta_{TRE,k} S_{tk} I(A_i = TRE) \right] + \left[ \sum_{k=1}^6 \beta_{CR,k} S_{tk} I(A_i = CR) \right] + b_i,$$

where  $I(\cdot)$  is the indicator function such that  $I(\cdot) = 1$  if the internal expression is true and is 0 otherwise.

The pairwise contrast comparing TRE to control is  $\beta_{TRE,6}$ , the contrast comparing CR to control is  $\beta_{CR,6}$ , and the contrast comparing TRE to CR is  $\beta_{TRE,6} - \beta_{CR,6}$ .
